# Supplementary material
Source: HighWire-hosted journal article supplement (https://www.cmaj.ca/highwire/filestream/59207/field_highwire_adjunct_files/1/five-delirium-2-at.pdf)
Supplement: five-delirium-2-at.pdf [file five-delirium-2-at.pdf]

## **Appendix 2: Acknowledgements**

Shirley Bush and Peter Lawlor receive research awards from the Department of Medicine, University of Ottawa. Peter Lawlor receives funding support through a joint research grant from the Gillin Family and Bruyère Foundation. Both authors have been involved in multiple recent publications on delirium as part of the Studies to Understand Delirium In Palliative Settings Program.
